# Supplementary material
Source: ML conference proceedings conference paper supplement (https://proceedings.mlr.press/v119/mao20a.html)
Supplement: Supplementary file 1 [file mao20a-supp.pdf]

# Adaptive Adversarial Multi-task Representation Learning (Supplementary)

Anonymous Authors<sup>1</sup>

## 1. Classification Accuracy

The error rates of MTL methods for sentiment analysis and topic classification are listed in Figure 1 and 2 respectively.

Table 1: Error rate of MTL methods in sentiment analysis

|          | BiLSTM      |                 |               |               |               | Text-CNN    |                 |               |               |               |
|----------|-------------|-----------------|---------------|---------------|---------------|-------------|-----------------|---------------|---------------|---------------|
|          | Single task | Uniform scaling | MGDA Weight   | AMTRL         | AAMTRL        | Single task | Uniform scaling | MGDA Weight   | AMTRL         | AAMTRL        |
| Books    | 13.00%      | 14.17%          | <b>12.76%</b> | 14.25%        | 14.50%        | 15.00%      | 14.10%          | 13.17%        | 16.00%        | <b>12.75%</b> |
| Elec.    | 20.25%      | 14.93%          | <b>12.91%</b> | 15.50%        | 13.50%        | 17.00%      | 13.96%          | 12.82%        | 13.50%        | <b>12.00%</b> |
| DVD      | 12.00%      | 14.25%          | <b>12.65%</b> | 14.25%        | 12.75%        | 14.75%      | 13.00%          | <b>13.85%</b> | 15.00%        | 14.25%        |
| Kitchen  | 20.75%      | 14.68%          | <b>13.06%</b> | 15.75%        | 14.50%        | 17.50%      | 14.95%          | 12.80%        | 12.00%        | <b>11.50%</b> |
| Apparel  | 13.50%      | 13.75%          | 12.26%        | 13.00%        | <b>10.25%</b> | 15.50%      | 12.25%          | 12.29%        | 14.25%        | <b>11.25%</b> |
| Camera   | 15.75%      | 13.88%          | <b>12.12%</b> | 8.50%         | 8.75%         | 12.25%      | 13.34%          | 13.63%        | 11.00%        | <b>9.75%</b>  |
| Health   | 20.00%      | 14.56%          | 12.69%        | <b>9.75%</b>  | 11.25%        | 14.50%      | 13.84%          | 12.78%        | <b>11.25%</b> | 13.25%        |
| Music    | 21.50%      | 13.58%          | 14.04%        | 14.75%        | <b>12.75%</b> | 18.00%      | <b>13.13%</b>   | 13.71%        | 16.75%        | 14.25%        |
| Toys     | 15.00%      | 15.57%          | 13.54%        | 10.50%        | <b>10.50%</b> | 14.00%      | 14.37%          | 12.96%        | 13.00%        | <b>10.50%</b> |
| Video    | 17.00%      | 15.55%          | 13.51%        | 12.25%        | <b>11.25%</b> | 13.75%      | 14.22%          | 12.91%        | 12.75%        | <b>11.75%</b> |
| Baby     | 16.50%      | 14.00%          | <b>11.94%</b> | 13.00%        | 12.25%        | 16.25%      | 13.16%          | 12.12%        | 12.50%        | <b>12.50%</b> |
| Mag.     | 11.00%      | 14.39%          | 12.68%        | 6.50%         | <b>6.50%</b>  | 12.08%      | 12.08%          | 13.79%        | 10.25%        | <b>6.00%</b>  |
| Software | 17.75%      | 15.40%          | 13.70%        | 9.50%         | <b>8.00%</b>  | 13.50%      | 14.70%          | 14.39%        | 8.75%         | <b>8.25%</b>  |
| Sports   | 22.75%      | 15.47%          | 13.76%        | <b>11.50%</b> | 13.00%        | 18.00%      | 14.41%          | 14.89%        | 11.25%        | <b>9.25%</b>  |
| Average  | 16.91%      | 14.58%          | 12.97%        | 12.07%        | <b>11.41%</b> | 15.15%      | 13.68%          | 13.29%        | 12.73%        | <b>11.23%</b> |

Table 2: Error rate of MTL methods in topic classification

|         | BiLSTM        |                 |               |              |               | Text-CNN      |                 |             |        |               |
|---------|---------------|-----------------|---------------|--------------|---------------|---------------|-----------------|-------------|--------|---------------|
|         | Single task   | Uniform scaling | MGDA Weight   | AMTRL        | AAMTRL        | Single task   | Uniform scaling | MGDA Weight | AMTRL  | AAMTRL        |
| Comp    | 21.59%        | 21.43%          | <b>20.03%</b> | 21.88%       | 22.93%        | 11.39%        | 12.48%          | 12.03%      | 11.32% | <b>11.00%</b> |
| Rec     | 11.91%        | 10.06%          | 11.93%        | <b>8.74%</b> | 8.99%         | 3.77%         | 4.72%           | 4.93%       | 4.21%  | <b>3.77%</b>  |
| TALK    | 8.80%         | 11.91%          | <b>10.10%</b> | 15.77%       | 11.97%        | <b>4.24%</b>  | 5.26%           | 5.26%       | 4.12%  | 4.94%         |
| SCI     | 22.75%        | 27.21%          | 26.75%        | 24.52%       | <b>21.52%</b> | <b>14.22%</b> | 16.83%          | 15.96%      | 16.30% | 14.83%        |
| Average | <b>16.26%</b> | 17.65%          | 17.20%        | 17.73%       | 17.20%        | <b>8.41%</b>  | 9.82%           | 9.55%       | 8.99%  | 8.64%         |
